# Supplementary material
Source: PubMed Central journal article supplement (PMC5927366)
Supplement: NIHMS960461-supplement-Supplementary_Information.pdf [file NIHMS960461-supplement-Supplementary_Information.pdf]

## SUPPORTING INFORMATION

### A Unimolecular Micelle-Based Hybrid System for Perivascular Drug Delivery Produces

#### Long-Term Efficacy for Neointima Attenuation in Rats

Guojun Chen<sup>1,#</sup>, Xudong Shi<sup>2,#,\*</sup>, Bowen Wang<sup>2</sup>, Ruosen Xie<sup>1</sup>, Lian-Wang Guo<sup>2,3,4,\*</sup>, Shaoqin Gong<sup>1,4,5,\*</sup>, K. Craig Kent<sup>2,6,\*</sup>

Figure S1.

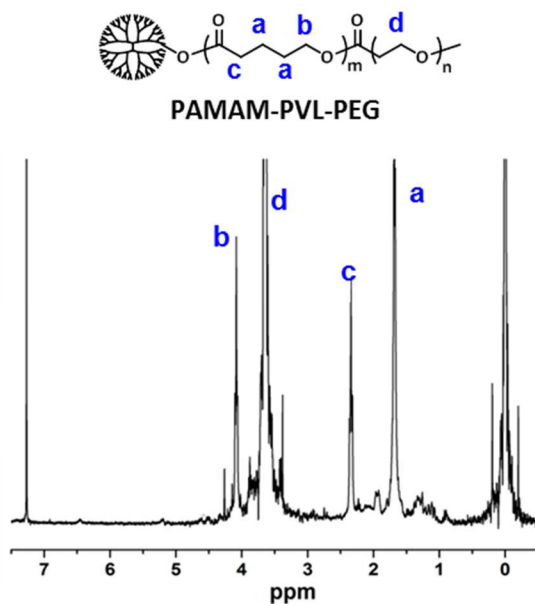

**Figure S1.** <sup>1</sup>H NMR spectrum of PAMAM-PVL-PEG.
